# Supplementary material for: Properties and activity of Zn–Ta-TUD-1 in the Lebedev process
Source: Royal Society of Chemistry journal article supplement (doi:10.1039/d0gc00103a), 2020-01-01
Supplement: d0gc00103a1.pdf [file d0gc00103a1.pdf]

*Electronic Supplementary Information*

**Properties and Activity of Zn-Ta-TUD-1 in the Lebedev Process**

Guillaume Pomalaza,<sup>a</sup> Pardis Simon,<sup>a</sup> Ahmmed Addad,<sup>b</sup> Mickaël Capron,<sup>a</sup> Franck Dumeignil<sup>a,\*</sup>

<sup>a</sup> Univ. Lille, CNRS, Centrale Lille, ENSCL, Univ. Artois, UMR 8181 – UCCS – Unité de Catalyse et Chimie du Solide, F-59000 Lille, France

<sup>b</sup> Univ. Lille, CNRS, UMR 8207 – UMET, F-59000 Lille, France

\*: corresponding author, [franck.dumeignil@univ-lille.fr](mailto:franck.dumeignil@univ-lille.fr)

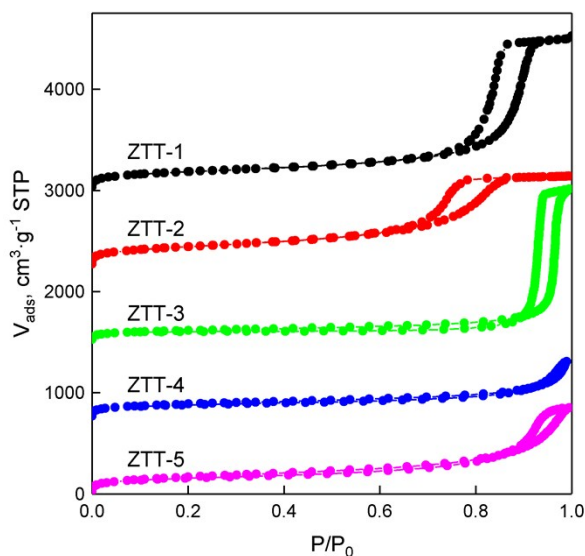

Figure S1 N<sub>2</sub> adsorption-desorption isotherms for all as-prepared catalysts after outgassing at 150 °C for 6 hours.

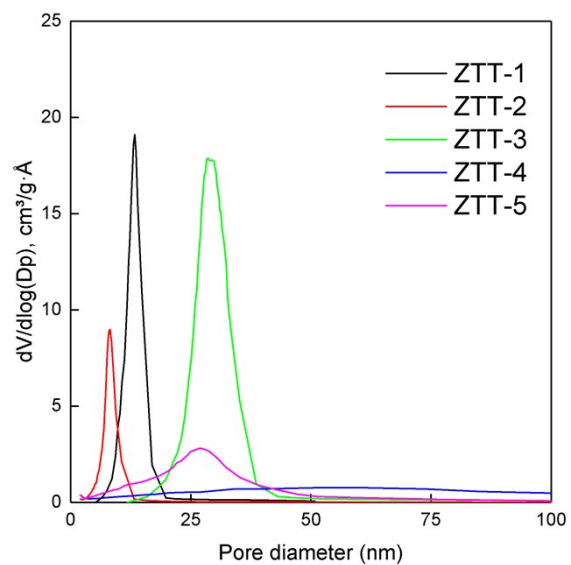

Figure S2 Pore size distribution of ZTT samples

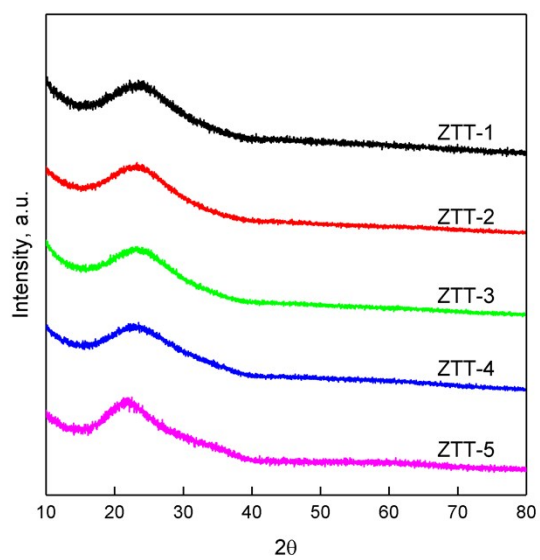

Figure S3 X-ray diffractogram of ZTT samples.

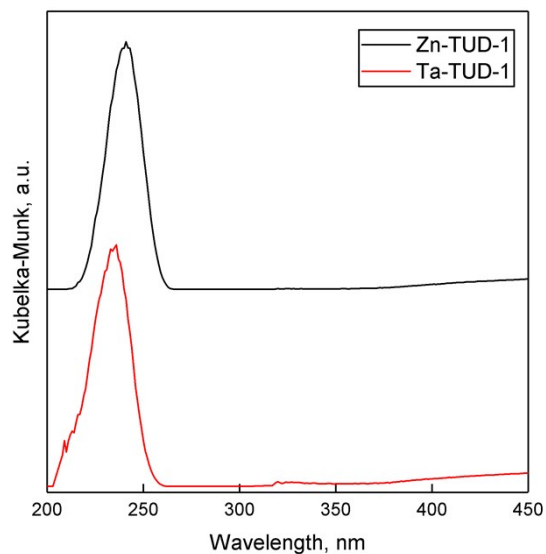

Figure S4 UV-Vis of monometallic TUD-1 samples

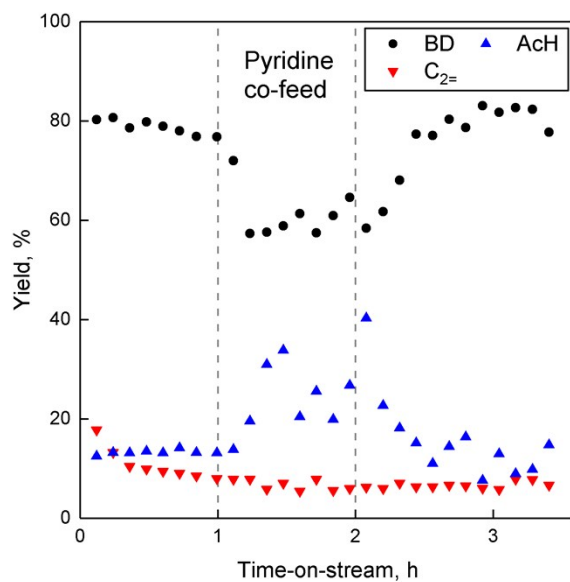

Figure S5 Pyridine poisoning reactivity test of the Lebedev process over ZTT-1. The reaction was carried at 350 °C, WHSV of 0.3 h<sup>-1</sup>. Concentration of pyridine in ethanol was 5 mol.%.

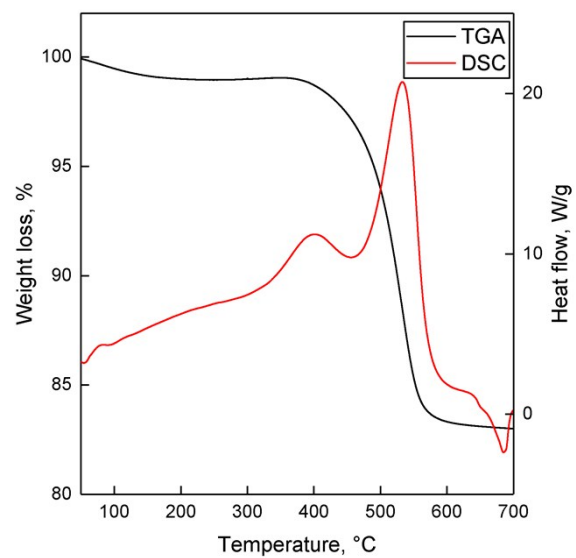

Figure S6 TGA-DSC thermogram of spent ZTT-1 after 72 hours of reaction at 400 °C and  $WHSV_{EtOH}$  of 5.3 h<sup>-1</sup>.

Table S1 Composition of species trapped within spent ZTT-1 catalysts according to their weight determined by TGA. Reaction at 400 °C and  $WHSV_{EtOH}$  of 5.3 h<sup>-1</sup>.

| TOS (h) | Volatile compounds (wt.%) | Light coke (wt.%) | Heavy coke (wt.%) | Total (wt.%) |
|---------|---------------------------|-------------------|-------------------|--------------|
| 1.5     | 1.3                       | 0.6               | 2.4               | 4.3          |
| 6       | 1.8                       | 0.8               | 3.7               | 6.3          |
| 24      | 1.4                       | 0.5               | 4.3               | 6.2          |
| 48      | 2.3                       | 0.3               | 7.6               | 10.3         |
| 72      | 1.2                       | 0.0               | 16.0              | 17.2         |
